# Supplementary material
Source: publisher figshare collection journal article supplement (https://tandf.figshare.com/articles/dataset/_/1569170)
Supplement: Supplementary file 9 [file 1]

# 1 Simulation results

We present the supplementary simulation results in this section for training and testing data.

## 1.1 Training: Average MSE

## 1.2 Training: Average Number of Negative Eigenvalues

Table 1: Average number of negative eigenvalues with standard error in parentheses for all methods for zero mean MA cases

| Class     | $MA(1) : 0.1$ | $MA(1) : 0.5$ | $MA(1) : 0.9$ | $MA(2)$     |
|-----------|---------------|---------------|---------------|-------------|
| GCV       | 0 (0)         | 0 (0)         | 1.64 (0.30)   | 0.02 (0.02) |
| GCVM      | 0 (0)         | 0.65 (0.24)   | 4.89 (0.68)   | 21.1 (0.41) |
| L-curve   | 0 (0)         | 0 (0)         | 0.86 (0.16)   | 0.02 (0.02) |
| L-curveEM | 0 (0)         | 0.10 (0.08)   | 4.45 (0.62)   | 11.9 (0.97) |
| BIC       | 0 (0)         | 0.60 (0.23)   | 4.81 (0.67)   | 21.0 (0.42) |
| HHC1      | 0 (0)         | 0 (0)         | 0 (0)         | 0 (0)       |
| HHCL      | 0 (0)         | 0 (0)         | 0 (0)         | 0 (0)       |
| band      | 0 (0)         | 0.31 (0.16)   | 3.91 (0.59)   | 10.7 (0.87) |
| spec      | 0 (0)         | 0 (0)         | 0 (0)         | 0 (0)       |

Table 2: Average number of negative eigenvalues with standard error in parentheses for all methods for nonzero mean MA cases

| Class     | $g + MA(1) : 0.1$ | $g + MA(1) : 0.5$ | $g + MA(1) : 0.9$ | $g + MA(2)$ |
|-----------|-------------------|-------------------|-------------------|-------------|
| GCV       | 0.02 (0.01)       | 0.05 (0.04)       | 0.41 (0.11)       | 0.02 (0.02) |
| GCVM      | 0.30 (0.22)       | 0 (0)             | 2.81 (0.39)       | 0 (0)       |
| L-curve   | 0.02 (0.01)       | 0.05 (0.04)       | 0.54 (0.12)       | 0.08 (0.05) |
| L-curveEM | 0.02 (0.02)       | 0 (0)             | 2.49 (0.33)       | 0.56 (0.19) |
| BIC       | 0 (0)             | 0.05 (0.04)       | 0.47 (0.11)       | 0.08 (0.05) |
| HHC1      | 0 (0)             | 0 (0)             | 0 (0)             | 0 (0)       |
| HHCL      | 0 (0)             | 0 (0)             | 0 (0)             | 0 (0)       |
| band      | 0.01 (0.01)       | 0.75 (0.19)       | 5.63 (0.45)       | 7.21 (0.59) |
| spec      | 0 (0)             | 0 (0)             | 0 (0)             | 0 (0)       |

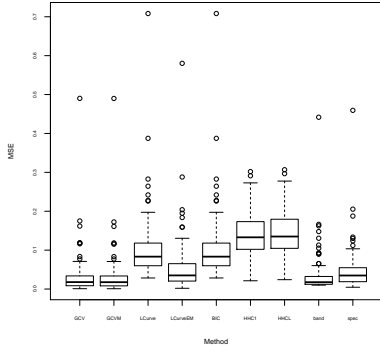

(a) MA(1): 0.1

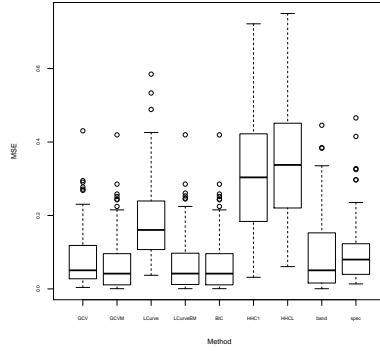

(b) MA(1): 0.5

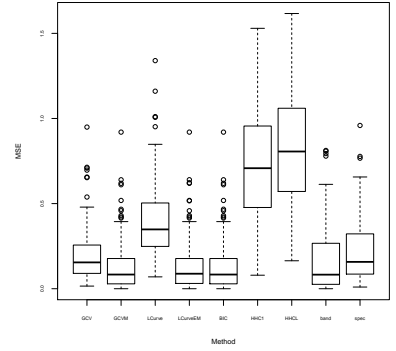

(c) MA(1): 0.9

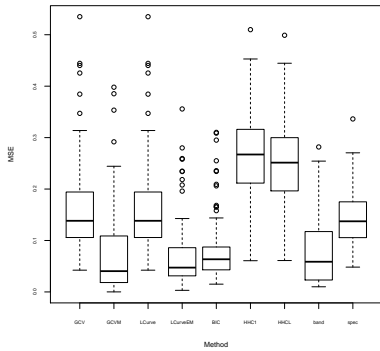

(d)  $g+MA(1)$ : 0.1

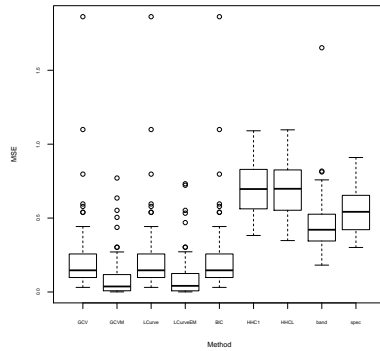

(e)  $g+MA(1)$ : 0.5

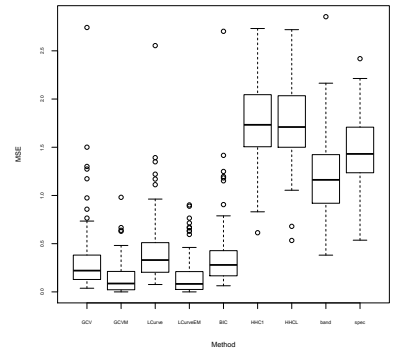

(f)  $g+MA(1)$ : 0.9

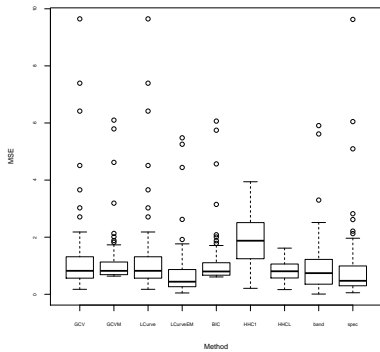

(g) MA(2): (0.9,0.8)

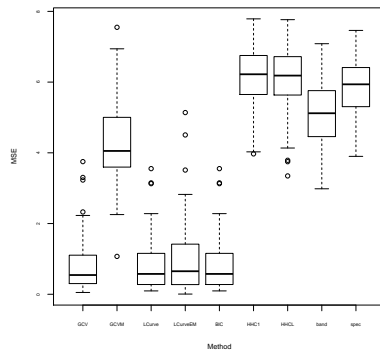

(h)  $g+MA(2)$ : (0.9,0.8)

Figure 1: Boxplots of Average MSE for MA cases

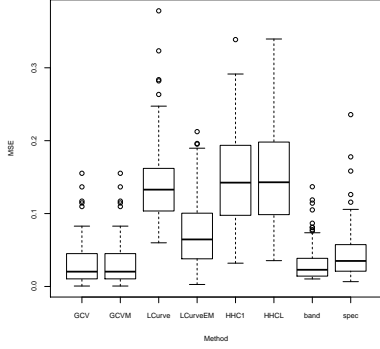

(a) AR(1): 0.1

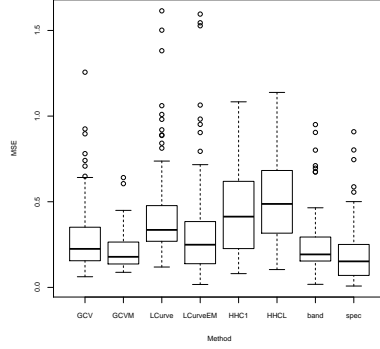

(b) AR(1): 0.5

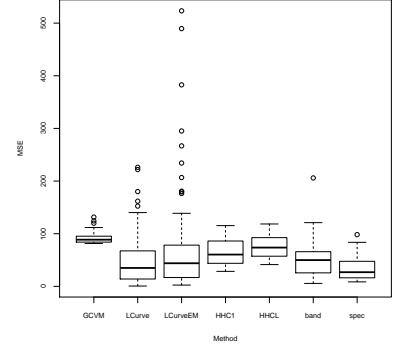

(c) AR(1): 0.9

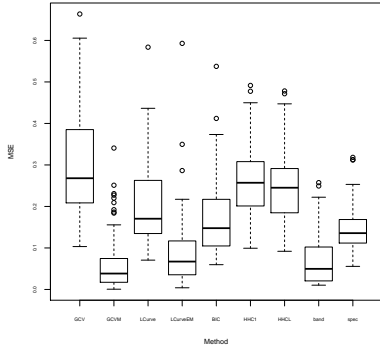

(d)  $g + \text{AR}(1)$ : 0.1

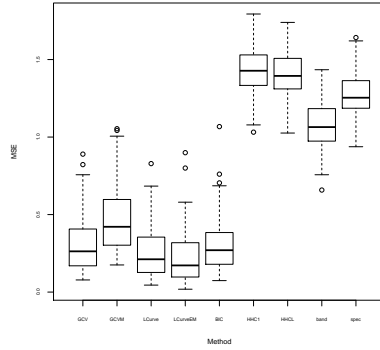

(e)  $g + \text{AR}(1)$ : 0.5

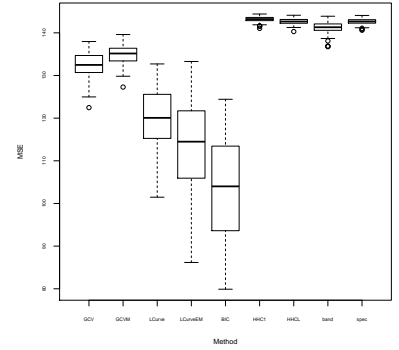

(f)  $g + \text{AR}(1)$ : 0.9

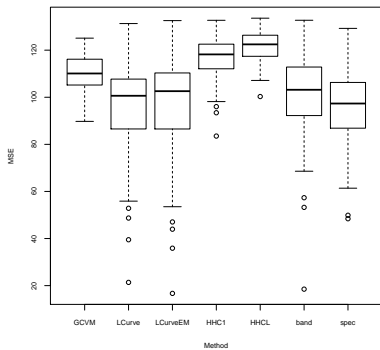

(g) AR(2): (-0.9, 0.2)

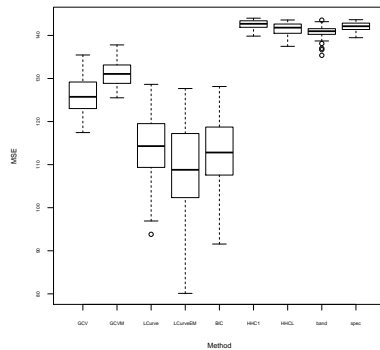

(h)  $g + \text{AR}(2)$ : (-0.9, 0.2)

Figure 2: Boxplots of Average MSE for AR cases. We exclude BIC for (a) and (b), and GCV and BIC for (c) due to their poor performance.

Table 3: Average number of negative eigenvalues with standard error in parentheses for all methods for zero mean AR cases

| Class     | $AR(1) : 0.1$ | $AR(1) : 0.5$ | $AR(1) : 0.9$ | $AR(2)$     |
|-----------|---------------|---------------|---------------|-------------|
| GCV       | 0 (0)         | 0 (0)         | 23.1 (0.58)   | 12.0 (0.33) |
| GCVM      | 0 (0)         | 2.94 (0.55)   | 31.5 (0.16)   | 25.6 (0.31) |
| L-curve   | 0 (0)         | 0 (0)         | 0.13 (0.06)   | 0 (0)       |
| L-curveEM | 0 (0)         | 0.05 (0.03)   | 2.49 (0.32)   | 2.20 (0.28) |
| BIC       | 20.1 (0.31)   | 21.0 (0.28)   | 22.6 (0.68)   | 21.5 (0.43) |
| HHC1      | 0 (0)         | 0 (0)         | 0 (0)         | 0 (0)       |
| HHCL      | 0 (0)         | 0 (0)         | 0 (0)         | 0 (0)       |
| band      | 0 (0)         | 1.62 (0.41)   | 0.88 (0.16)   | 4.09 (0.69) |
| spec      | 0 (0)         | 0 (0)         | 0 (0)         | 0 (0)       |

Table 4: Average number of negative eigenvalues with standard error in parentheses for all methods for nonzero mean AR cases

| Class     | $g + AR(1) : 0.1$ | $g + AR(1) : 0.5$ | $g + AR(1) : 0.9$ | $g + AR(2)$ |
|-----------|-------------------|-------------------|-------------------|-------------|
| GCV       | 0.42 (0.08)       | 0 (0)             | 0 (0)             | 0 (0)       |
| GCVM      | 0 (0)             | 0 (0)             | 0 (0)             | 0 (0)       |
| L-curve   | 0.02 (0.01)       | 0.05 (0.03)       | 0.06 (0.03)       | 0.02 (0.02) |
| L-curveEM | 0.03 (0.02)       | 0.12 (0.05)       | 0.09 (0.05)       | 0.29 (0.10) |
| BIC       | 0.01 (0.01)       | 0.43 (0.09)       | 2.49 (0.21)       | 0.22 (0.06) |
| HHC1      | 0 (0)             | 0 (0)             | 0 (0)             | 0 (0)       |
| HHCL      | 0 (0)             | 0 (0)             | 0 (0)             | 0 (0)       |
| band      | 0.03 (0.03)       | 0.45 (0.13)       | 0.25 (0.10)       | 1.31 (0.20) |
| spec      | 0 (0)             | 0 (0)             | 0 (0)             | 0 (0)       |

Table 5: Comparison of average MSE and standard error for MA(1): 0.9

| Class     | Zero         |              | Nonzero      |              |
|-----------|--------------|--------------|--------------|--------------|
|           | Original     | Revised      | Original     | Revised      |
| GCV       | 0.21 (0.018) | 0.21 (0.018) | 0.33 (0.037) | 0.33 (0.037) |
| GCVM      | 0.14 (0.017) | 0.14 (0.017) | 0.15 (0.018) | 0.15 (0.018) |
| L-curve   | 0.42 (0.024) | 0.42 (0.024) | 0.42 (0.035) | 0.42 (0.035) |
| L-curveEM | 0.14 (0.017) | 0.14 (0.017) | 0.16 (0.021) | 0.16 (0.021) |
| BIC       | 0.14 (0.017) | 0.14 (0.017) | 0.37 (0.036) | 0.37 (0.036) |

Table 6: Comparison of average MSE and standard error for AR(1):0.9

| Class     | Zero        |             | Nonzero    |            |
|-----------|-------------|-------------|------------|------------|
|           | Original    | Revised     | Original   | Revised    |
| GCV       | 495 (62.2)  | 455 (57.2)  | 132 (0.30) | 132 (0.30) |
| GCVM      | 91.3 (0.96) | 90.2 (0.95) | 135 (0.23) | 135 (0.23) |
| L-curve   | 46.2 (4.47) | 46.2 (4.47) | 120 (0.65) | 120 (0.65) |
| L-curveEM | 68.5 (9.03) | 68.4 (8.99) | 114 (1.04) | 114 (1.04) |
| BIC       | 583 (75.2)  | 512 (66.2)  | 103 (1.21) | 103 (1.21) |
