# Supplementary material
Source: publisher figshare collection journal article supplement (https://tandf.figshare.com/articles/dataset/_/1569170)
Supplement: Supplementary file 19 [file 1]

# 1 Supplementary proofs

## 1.1 Derivation of the Estimator

For the special case of  $\alpha = 2$  and  $q = 2$ ,  $f_n(\gamma; \lambda)$  in (3.1) can be rewritten in the matrix form as follows:

$$f_n(\gamma; \lambda) = (\mathbf{y} - \mathbf{X}\gamma)^\top (\mathbf{y} - \mathbf{X}\gamma) + \lambda(\mathbf{A}\gamma)^\top (\mathbf{A}\gamma).$$

The first derivative of  $f_n(\gamma; \lambda)$  with respect to  $\gamma(k)$  are

$$\begin{aligned} \frac{\partial f_n(\gamma; \lambda)}{\partial \gamma(0)} &= 2n\gamma(0) - 2\mathbf{z}_0^\top \mathbf{1}_n, \\ \frac{\partial f_n(\gamma; \lambda)}{\partial \gamma(k)} &= 2(n-k)\gamma(k) - 2\mathbf{z}_k^\top \mathbf{1}_{n-k} + 2\lambda k^2 \gamma(k). \end{aligned}$$

Let  $\frac{\partial f_n(\gamma; \lambda)}{\partial \gamma(k)} = 0$  for  $k = 0, 1, \dots, n-1$ . Solving these equations gives

$$\hat{\gamma}(0) = \frac{1}{n} \mathbf{1}_n^\top \mathbf{z}_0, \quad \hat{\gamma}(k) = \frac{1}{(n-k) + \lambda k^2} \mathbf{1}_{n-k}^\top \mathbf{z}_k, \quad \text{for } k = 1, \dots, n-1.$$

We note that if  $k \leq \lambda k^2$ ,

$$|\hat{\gamma}(k)| \leq |\bar{\gamma}(k)| \leq \bar{\gamma}(0) = \hat{\gamma}(0).$$

Hence, the proposed estimator satisfies the restriction  $\mathcal{C} = \{\gamma : \gamma(0) \geq |\gamma(k)|, k = 1, \dots, n-1\}$ .

Here, we use the fact that  $\bar{\gamma}(k)$ , the sample autocovariance function defined in (1.2), is nonnegative definite, and thus  $|\bar{\gamma}(k)| \leq \bar{\gamma}(0)$ .

## 1.2 Proofs of Theorems 1 and 2

We present the proofs of Theorems 1 and 2 by following the setting and notation in Wu (2009).

Let  $\kappa_p = \|\mathbf{Y}_i\|_p$ .

For Theorem 1, we use the coupling argument and central limit theorem for stationary processes (Hannan, 1973). Similar calculations to the proof of Theorem 1 in Wu (2009) give

$$\sum_{i=0}^{\infty} \|\mathcal{P}_0(Y_i Y_{i-k})\| \leq 2\kappa_4 \sum_{i=0}^{\infty} \delta_4(i) < \infty.$$

Also, for  $0 \leq j \leq k$  and appropriate  $\lambda$ ,  $\frac{n}{(n-j) + \lambda j^2} \leq 1$ , which results in  $\sum_{i=0}^{\infty} \|\mathcal{P}_0(Y_i \mathbf{A}_k \boldsymbol{\eta}_i)\| < \infty$ . Hence, by the Cramer-Wold device, (3.4) follows from Theorem 1 in (Hannan, 1973).

For Theorem 2, let  $T_{nj} = \sum_{i=1}^{n-j} (Y_i Y_{i+j} - \gamma(j))$ . The calculations of the proof are similar to the proof of Theorem 7 (i) in Wu (2011). In particular following Wu (2011) we obtain:

$$\|\mathcal{P}_0(Y_i Y_{i+j})\|_{p/2} \leq \|Y_i\|_p \delta_p(i+j) + \delta_p(i) \|Y'_{i+j}\|_p,$$

for  $j \geq 0$ . By the triangle inequality,

$$\|T_{nj}\|_{p/2} = \left\| \sum_{i=1}^{n-j} \sum_{l \in \mathbb{Z}} \mathcal{P}_{i-l} Y_i Y_{i+j} \right\|_{p/2} \leq \sum_{l \in \mathbb{Z}} \left\| \sum_{i=1}^{n-j} \mathcal{P}_{i-l} Y_i Y_{i+j} \right\|_{p/2}.$$

Note that  $\mathcal{P}_{i-l} Y_i Y_{i+j}$ ,  $i = 1, \dots, n$ , form stationary martingale differences. Using Burkholder's moment inequality for martingale differences (Burkholder, 1988), the fact  $p/4 \leq 1$  and simple algebra we obtain

$$\left\| \sum_{i=1}^{n-j} \mathcal{P}_{i-l} Y_i Y_{i+j} \right\|_{p/2}^{p/2} \leq \frac{\mathbb{E}\{[\sum_{i=1}^{n-j} (\mathcal{P}_{i-l} Y_i Y_{i+j})^2]^{p/4}\}}{(p/2 - 1)^{p/2}} \leq \frac{(n-j) \|\mathcal{P}_0 Y_l Y_{l+j}\|_{p/2}^{p/2}}{(p/2 - 1)^{p/2}}.$$

From these three facts

$$\begin{aligned} \|T_{nj}\|_{p/2} &\leq \sum_{l \in \mathbb{Z}} \left\| \sum_{i=1}^{n-j} \mathcal{P}_{i-l} Y_i Y_{i+j} \right\|_{p/2} \\ &\leq \sum_{l \in \mathbb{Z}} \frac{(n-j)^{2/p} \|\mathcal{P}_0 Y_l Y_{l+j}\|_{p/2}}{p/2 - 1} \\ &= \frac{(n-j)^{2/p}}{p/2 - 1} \sum_{l \in \mathbb{Z}} \left( \|Y_l\|_p \delta_p(l+j) + \delta_p(l) \|Y'_{l+j}\|_p \right) \\ &\leq \frac{4(n-j)^{2/p} \kappa_p \Delta_p}{p-2}. \end{aligned}$$

Since  $\delta_p(i) = 0$  if  $i < 0$ ,

$$\begin{aligned} \hat{\gamma}(k) - \frac{n-k}{(n-k) + \lambda k^2} \gamma(k) &= \frac{1}{(n-k) + \lambda k^2} \sum_{i=1}^{n-k} (Y_i Y_{i+k} - \gamma(k)) \\ &\leq \frac{1}{n-k} \sum_{i=1}^{n-k} (Y_i Y_{i-k} - \gamma(k)) \\ &= \frac{1}{n-k} T_{nk} \end{aligned}$$

for appropriate  $\lambda$ . Hence,

$$\begin{aligned} \left\| \hat{\gamma}(k) - \left( 1 - \frac{\lambda k^2}{(n-k) + \lambda k^2} \right) \gamma(k) \right\|_{p/2} &\leq \frac{4(n-k)^{2/p} \kappa_p \Delta_p}{(p-2)n} \\ &= \frac{4\|Y_1\|_p \Delta_p}{(p-2)n^{1-2/p}}. \end{aligned}$$

## References

- Burkholder, D. L. (1988). Sharp inequalities for martingales and stochastic integrals. In *Colloque Paul Lévy sur les Processus Stochastiques*, pages 75–94. Ecole polytechnique, Palaiseau. Astérisque No. 157-158.
- Hannan, E. J. (1973). Central limit theorems for time series regression. *Z. Wahrsch. Verw. Gebiete*, 26:157–170.
- Wu, W. B. (2009). An asymptotic theory for sample covariances of bernoulli shifts. *Stochastic Processes and their Applications*, 119:453–467.
- Wu, W. B. (2011). Asymptotic theory for stationary processes. *Statistics and its Interface*, 4(2):207–226.
